# Supplementary material
Source: PubMed Central journal article supplement (PMC6297934)

## Supplementary Material

### Table 1 Supplement

Patient characteristics % (n)

|                                       | NAFL (n=14)     | NASH (n=18)     | HC (n=27)      |
|---------------------------------------|-----------------|-----------------|----------------|
| sex m/f                               | 6/8             | 7/11            | 8/19           |
| age (mean $\pm$ SD) y                 | 41.1 $\pm$ 10.1 | 51.3 $\pm$ 14.1 | 27.0 $\pm$ 3.3 |
| BMI (mean $\pm$ SD) kg/m <sup>2</sup> | 48.4 $\pm$ 9.3  | 45.1 $\pm$ 9.5  | 21.4 $\pm$ 2.9 |
| Hypertension % (n)                    | 35.7 (5)        | 72.2 (13)       | 0 (0)          |
| Diabetes mellitus % (n)               | 28.6 (4)        | 55.6 (10)       | 0 (0)          |
| Hyperlipidemia % (n)                  | 21.4 (3)        | 33.3 (6)        | 0 (0)          |

### Table 2a Supplement

| Species                             | HC<br>(median) | HC (SD) | NAFL<br>(median) | NAFL<br>(SD) | NASH<br>(median) | NASH<br>(SD) |
|-------------------------------------|----------------|---------|------------------|--------------|------------------|--------------|
| <i>Bacteroides</i>                  | 9,89%          | 7,19%   | 12,63%           | 9,19%        | 9,66%            | 9,21%        |
| <i>Escherichia.coli</i>             | 0,07%          | 4,59%   | 0,15%            | 2,06%        | 1,77%            | 8,59%        |
| <i>Faecalibacterium.prausnitzii</i> | 5,54%          | 3,60%   | 6,95%            | 7,35%        | 5,92%            | 5,84%        |
| <i>Prevotella.copri</i>             | 0,03%          | 7,04%   | 0,06%            | 15,70%       | 0,06%            | 13,70%       |
| <i>Bacteroides.uniformis</i>        | 4,88%          | 5,92%   | 2,77%            | 5,13%        | 2,16%            | 3,43%        |
| <i>Lachnospiraceae</i>              | 4,16%          | 1,82%   | 4,14%            | 2,52%        | 4,15%            | 1,56%        |
| <i>Blautia</i>                      | 2,92%          | 2,13%   | 3,17%            | 4,35%        | 3,28%            | 1,57%        |
| <i>Oscillospira</i>                 | 4,88%          | 2,70%   | 1,17%            | 1,57%        | 1,79%            | 3,60%        |
| <i>Coprococcus</i>                  | 3,46%          | 1,55%   | 3,31%            | 3,13%        | 2,52%            | 1,58%        |
| <i>Ruminococcus</i>                 | 3,45%          | 3,82%   | 0,43%            | 5,23%        | 0,41%            | 5,18%        |
| <i>Dialister</i>                    | 0,88%          | 2,25%   | 4,90%            | 4,60%        | 0,74%            | 2,62%        |
| <i>Ruminococcaceae</i>              | 2,80%          | 2,56%   | 0,57%            | 0,79%        | 1,38%            | 1,42%        |
| <i>Akkermansia.muciniphila</i>      | 0,05%          | 6,08%   | 0,01%            | 0,41%        | 0,00%            | 4,09%        |
| <i>Phascolarctobacterium</i>        | 1,08%          | 2,63%   | 0,03%            | 1,80%        | 1,02%            | 5,75%        |
| <i>Streptococcus</i>                | 0,25%          | 0,50%   | 0,30%            | 2,35%        | 0,24%            | 1,87%        |
| <i>Sutterella</i>                   | 1,61%          | 1,32%   | 2,00%            | 1,86%        | 0,72%            | 2,34%        |
| <i>Megasphaera</i>                  | 0,00%          | 0,81%   | 0,02%            | 6,46%        | 0,00%            | 6,59%        |
| <i>Parabacteroides</i>              | 0,79%          | 1,34%   | 0,49%            | 1,11%        | 0,07%            | 0,32%        |
| <i>Acidaminococcus</i>              | 0,00%          | 0,01%   | 0,04%            | 2,99%        | 0,00%            | 5,75%        |
| <i>Bifidobacterium.adolescentis</i> | 0,43%          | 0,96%   | 0,15%            | 12,60%       | 0,14%            | 1,34%        |
| <i>Clostridiaceae</i>               | 0,68%          | 1,26%   | 0,57%            | 1,81%        | 0,27%            | 1,55%        |
| <i>Collinsella.aerofaciens</i>      | 0,80%          | 0,87%   | 1,79%            | 2,27%        | 0,62%            | 0,66%        |
| <i>Ruminococcus.bromii</i>          | 0,74%          | 1,66%   | 0,00%            | 3,97%        | 0,38%            | 1,02%        |
| <i>Clostridium.clostridioforme</i>  | 0,96%          | 1,43%   | 0,95%            | 0,91%        | 0,69%            | 0,82%        |
| <i>Parabacteroides.distasonis</i>   | 0,67%          | 1,19%   | 0,62%            | 0,97%        | 0,59%            | 3,16%        |
| <i>Roseburia.inulinivorans</i>      | 0,35%          | 1,18%   | 0,64%            | 1,23%        | 0,38%            | 2,33%        |
| <i>Bacteroidales</i>                | 0,17%          | 5,09%   | 0,15%            | 0,34%        | 0,23%            | 0,32%        |
| <i>Gemmiger.formicilis</i>          | 0,55%          | 0,97%   | 0,54%            | 0,92%        | 0,52%            | 0,86%        |

|                                   |                 |                |                 |             |                 |             |
|-----------------------------------|-----------------|----------------|-----------------|-------------|-----------------|-------------|
| <i>Roseburia.faecis</i>           | 0,62%           | 1,37%          | 0,54%           | 1,46%       | 0,46%           | 1,10%       |
| <i>Clostridiales</i>              | 0,82%           | 2,17%          | 0,07%           | 0,30%       | 0,14%           | 0,80%       |
| <i>Lachnospira</i>                | 1,33%           | 1,93%          | 0,21%           | 1,06%       | 0,19%           | 0,52%       |
| <i>Bacteroides.fragilis</i>       | 0,17%           | 0,57%          | 0,00%           | 0,69%       | 0,06%           | 1,56%       |
| <i>Rikenellaceae</i>              | 0,90%           | 1,46%          | 0,31%           | 0,78%       | 0,21%           | 0,56%       |
| <i>Firmicutes</i>                 | 0,75%           | 3,59%          | 0,00%           | 0,08%       | 0,01%           | 1,41%       |
| <i>Alistipes.onderdonkii</i>      | 0,28%           | 1,47%          | 0,01%           | 0,27%       | 0,04%           | 0,89%       |
| <i>Barnesiellaceae</i>            | 0,99%           | 0,93%          | 0,42%           | 1,35%       | 0,16%           | 0,73%       |
| <i>Bacteroides.eggerthii</i>      | 0,00%           | 0,74%          | 0,00%           | 1,05%       | 0,00%           | 1,38%       |
| <i>Veillonella.dispar</i>         | 0,01%           | 0,30%          | 0,01%           | 0,34%       | 0,03%           | 0,86%       |
| <i>Bacteroides.caccae</i>         | 0,06%           | 0,57%          | 0,40%           | 0,78%       | 0,11%           | 0,52%       |
| <i>Enterobacteriaceae</i>         | 0,02%           | 0,10%          | 0,00%           | 0,01%       | 0,07%           | 8,38%       |
| <i>Prevotella</i>                 | 0,00%           | 3,79%          | 0,00%           | 0,08%       | 0,00%           | 1,59%       |
| <i>Christensenellaceae</i>        | 0,71%           | 1,34%          | 0,01%           | 0,31%       | 0,12%           | 0,31%       |
| <i>Bifidobacterium.longum</i>     | 0,62%           | 1,06%          | 0,27%           | 0,47%       | 0,08%           | 0,94%       |
| <b>Species</b>                    | <b>HC</b>       | <b>HC (SD)</b> | <b>NAFL</b>     | <b>NAFL</b> | <b>NASH</b>     | <b>NASH</b> |
|                                   | <b>(median)</b> |                | <b>(median)</b> | <b>(SD)</b> | <b>(median)</b> | <b>(SD)</b> |
| <i>Dorea</i>                      | 0,31%           | 0,24%          | 0,59%           | 1,18%       | 0,60%           | 0,61%       |
| <i>Succinivibrio</i>              | 0,00%           | 1,91%          | 0,00%           | 0,00%       | 0,00%           | 6,79%       |
| <i>Bacteroidetes</i>              | 0,00%           | 0,57%          | 0,00%           | 0,01%       | 0,00%           | 0,09%       |
| <i>Blautia.obelum</i>             | 0,43%           | 0,64%          | 0,31%           | 0,23%       | 0,18%           | 0,42%       |
| <i>Paraprevotella</i>             | 0,00%           | 0,38%          | 0,00%           | 2,62%       | 0,00%           | 0,42%       |
| <i>Prevotella</i>                 | 0,00%           | 1,53%          | 0,00%           | 0,01%       | 0,00%           | 1,02%       |
| <i>Ruminococcus.torques</i>       | 0,07%           | 0,13%          | 0,18%           | 0,51%       | 0,34%           | 0,82%       |
| <i>Roseburia</i>                  | 0,26%           | 0,71%          | 0,39%           | 0,59%       | 0,10%           | 0,28%       |
| <i>Clostridiaceae</i>             | 0,24%           | 0,87%          | 0,16%           | 0,67%       | 0,32%           | 0,46%       |
| <i>Clostridium.citroniae</i>      | 0,01%           | 0,04%          | 0,07%           | 0,09%       | 0,01%           | 0,38%       |
| <i>Bifidobacterium</i>            | 0,02%           | 1,25%          | 0,03%           | 0,39%       | 0,05%           | 1,36%       |
| <i>Odoribacter</i>                | 0,45%           | 0,33%          | 0,11%           | 0,19%       | 0,09%           | 0,27%       |
| <i>Bilophila</i>                  | 0,32%           | 0,53%          | 0,07%           | 0,41%       | 0,20%           | 0,58%       |
| <i>Fusobacterium</i>              | 0,00%           | 0,03%          | 0,00%           | 0,00%       | 0,00%           | 1,47%       |
| <i>Clostridium.celatum</i>        | 0,02%           | 0,66%          | 0,03%           | 0,15%       | 0,06%           | 0,54%       |
| <i>Prevotella.stercorea</i>       | 0,00%           | 0,26%          | 0,00%           | 2,47%       | 0,00%           | 0,68%       |
| <i>Desulfovibrio</i>              | 0,01%           | 1,02%          | 0,00%           | 0,90%       | 0,00%           | 1,34%       |
| <i>Alistipes.finegoldii</i>       | 0,12%           | 0,68%          | 0,01%           | 0,12%       | 0,00%           | 0,05%       |
| <i>Bacteroides.plebeius</i>       | 0,00%           | 1,28%          | 0,00%           | 0,78%       | 0,00%           | 6,80%       |
| <i>Erysipelotrichaceae</i>        | 0,33%           | 0,30%          | 0,07%           | 0,31%       | 0,00%           | 0,11%       |
| <i>Butyricoccus.pullicaecorum</i> | 0,12%           | 0,10%          | 0,31%           | 0,15%       | 0,22%           | 0,21%       |
| <i>Coriobacteriaceae</i>          | 0,12%           | 0,31%          | 0,11%           | 0,13%       | 0,04%           | 0,33%       |
| <i>Mogibacteriaceae</i>           | 0,16%           | 0,12%          | 0,07%           | 0,15%       | 0,11%           | 0,32%       |
| <i>Haemophilus.parainfluenzae</i> | 0,03%           | 0,42%          | 0,00%           | 0,19%       | 0,02%           | 0,15%       |
| <i>Blautia.producta</i>           | 0,07%           | 0,33%          | 0,00%           | 0,04%       | 0,00%           | 0,26%       |
| <i>Coprococcus.eutactus</i>       | 0,02%           | 0,69%          | 0,00%           | 0,61%       | 0,00%           | 0,31%       |
| <i>RF32</i>                       | 0,11%           | 0,81%          | 0,00%           | 0,09%       | 0,00%           | 0,05%       |

|                                     |                 |                |                 |             |                 |             |
|-------------------------------------|-----------------|----------------|-----------------|-------------|-----------------|-------------|
| <i>Eubacterium.biforme</i>          | 0,00%           | 0,18%          | 0,00%           | 0,09%       | 0,23%           | 0,77%       |
| <i>Dorea.formicigenerans</i>        | 0,14%           | 0,20%          | 0,15%           | 0,10%       | 0,12%           | 0,11%       |
| <i>Lachnobacterium</i>              | 0,00%           | 0,42%          | 0,00%           | 0,17%       | 0,00%           | 0,49%       |
| <i>Bacteria</i>                     | 0,23%           | 0,55%          | 0,01%           | 0,07%       | 0,01%           | 0,13%       |
| YS2                                 | 0,07%           | 1,07%          | 0,00%           | 0,17%       | 0,00%           | 0,21%       |
| <i>Bacteroidales</i>                | 0,00%           | 0,51%          | 0,00%           | 0,06%       | 0,00%           | 0,20%       |
| <i>Anaerostipes</i>                 | 0,11%           | 0,08%          | 0,10%           | 0,15%       | 0,00%           | 0,15%       |
| <i>Ruminococcus.callidus</i>        | 0,00%           | 0,17%          | 0,00%           | 0,14%       | 0,00%           | 0,12%       |
| <i>Streptococcus.infantis</i>       | 0,00%           | 0,11%          | 0,00%           | 0,06%       | 0,00%           | 0,03%       |
| <i>Veillonella.parvula</i>          | 0,00%           | 0,06%          | 0,00%           | 0,06%       | 0,01%           | 0,26%       |
| <i>Butyricimonas</i>                | 0,05%           | 0,12%          | 0,01%           | 0,24%       | 0,00%           | 0,10%       |
| <i>Bifidobacterium.bifidum</i>      | 0,00%           | 0,11%          | 0,00%           | 0,87%       | 0,00%           | 0,28%       |
| <i>Coprococcus.catus</i>            | 0,12%           | 0,11%          | 0,03%           | 0,12%       | 0,02%           | 0,14%       |
| <i>Lactobacillus</i>                | 0,09%           | 0,14%          | 0,04%           | 0,29%       | 0,10%           | 0,17%       |
| RF39                                | 0,01%           | 0,65%          | 0,00%           | 0,01%       | 0,00%           | 0,06%       |
| <i>Lachnospiraceae</i>              | 0,03%           | 0,21%          | 0,02%           | 0,25%       | 0,03%           | 0,14%       |
| <i>Turicibacter</i>                 | 0,02%           | 0,12%          | 0,00%           | 0,14%       | 0,00%           | 0,23%       |
| <b>Species</b>                      | <b>HC</b>       | <b>HC (SD)</b> | <b>NAFL</b>     | <b>NAFL</b> | <b>NASH</b>     | <b>NASH</b> |
|                                     | <b>(median)</b> |                | <b>(median)</b> | <b>(SD)</b> | <b>(median)</b> | <b>(SD)</b> |
| <i>Anaerotruncus</i>                | 0,05%           | 0,11%          | 0,01%           | 0,03%       | 0,02%           | 0,15%       |
| <i>Adlercreutzia</i>                | 0,05%           | 0,09%          | 0,05%           | 0,09%       | 0,01%           | 0,07%       |
| <i>Actinomyces</i>                  | 0,02%           | 0,03%          | 0,01%           | 0,05%       | 0,02%           | 0,05%       |
| <i>Lactobacillus.reuteri</i>        | 0,00%           | 0,02%          | 0,00%           | 0,26%       | 0,00%           | 0,63%       |
| <i>Ruminococcus.gnavus</i>          | 0,02%           | 0,04%          | 0,00%           | 0,08%       | 0,03%           | 0,12%       |
| <i>Enterococcus</i>                 | 0,00%           | 0,01%          | 0,00%           | 0,11%       | 0,00%           | 0,28%       |
| <i>Alistipes.massiliensis</i>       | 0,00%           | 0,15%          | 0,00%           | 0,01%       | 0,00%           | 0,04%       |
| <i>Halomonas</i>                    | 0,01%           | 0,04%          | 0,01%           | 0,08%       | 0,01%           | 0,13%       |
| <i>Slackia</i>                      | 0,00%           | 0,15%          | 0,00%           | 0,07%       | 0,00%           | 0,08%       |
| <i>Clostridium.ramosum</i>          | 0,00%           | 0,02%          | 0,00%           | 0,05%       | 0,00%           | 0,36%       |
| <i>Bacteroides.ovatus</i>           | 0,01%           | 0,04%          | 0,01%           | 0,04%       | 0,00%           | 0,03%       |
| <i>Alistipes.indistinctus</i>       | 0,01%           | 0,11%          | 0,00%           | 0,02%       | 0,01%           | 0,02%       |
| <i>Clostridium.symbiosum</i>        | 0,00%           | 0,01%          | 0,00%           | 0,00%       | 0,00%           | 0,09%       |
| <i>Defluviitalea.saccharophila</i>  | 0,03%           | 0,10%          | 0,00%           | 0,03%       | 0,00%           | 0,05%       |
| <i>Shewanella.algae</i>             | 0,00%           | 0,02%          | 0,00%           | 0,04%       | 0,00%           | 0,09%       |
| ML615J.28                           | 0,00%           | 0,27%          | 0,00%           | 0,00%       | 0,00%           | 0,03%       |
| <i>Lactobacillus.manihotivorans</i> | 0,00%           | 0,02%          | 0,00%           | 0,02%       | 0,00%           | 0,01%       |
| <i>Clostridium.hathewayi</i>        | 0,00%           | 0,04%          | 0,00%           | 0,02%       | 0,00%           | 0,03%       |
| <i>Eggerthella.lenta</i>            | 0,00%           | 0,03%          | 0,00%           | 0,04%       | 0,00%           | 0,08%       |
| <i>Clostridium.methylpentosum</i>   | 0,03%           | 0,04%          | 0,00%           | 0,04%       | 0,00%           | 0,05%       |
| <i>Eubacterium.dolichum</i>         | 0,00%           | 0,01%          | 0,00%           | 0,02%       | 0,00%           | 0,03%       |
| <i>Rothia.mucilaginosa</i>          | 0,00%           | 0,02%          | 0,00%           | 0,01%       | 0,00%           | 0,05%       |
| <i>Lactococcus</i>                  | 0,00%           | 0,03%          | 0,00%           | 0,00%       | 0,00%           | 0,09%       |
| <i>Oxalobacter.formigenes</i>       | 0,00%           | 0,03%          | 0,00%           | 0,02%       | 0,00%           | 0,04%       |
| <i>Olsenella</i>                    | 0,00%           | 0,02%          | 0,00%           | 0,05%       | 0,00%           | 0,14%       |

|                               |       |       |       |       |       |       |
|-------------------------------|-------|-------|-------|-------|-------|-------|
| <i>Holdemania</i>             | 0,01% | 0,03% | 0,00% | 0,02% | 0,00% | 0,06% |
| <i>Clostridium.lavalense</i>  | 0,00% | 0,01% | 0,00% | 0,03% | 0,00% | 0,08% |
| <i>Ruminococcaceae</i>        | 0,02% | 0,07% | 0,00% | 0,00% | 0,00% | 0,00% |
| <i>Mogibacterium</i>          | 0,00% | 0,00% | 0,00% | 0,03% | 0,00% | 0,09% |
| <i>Clostridium.spiroforme</i> | 0,00% | 0,02% | 0,00% | 0,04% | 0,00% | 0,01% |
| <i>TM7.3</i>                  | 0,00% | 0,01% | 0,00% | 0,01% | 0,00% | 0,01% |
| <i>Dehalobacterium</i>        | 0,00% | 0,03% | 0,00% | 0,02% | 0,00% | 0,02% |
| <i>Clostridia</i>             | 0,00% | 0,03% | 0,00% | 0,00% | 0,00% | 0,01% |
| <i>Alistipes.putredinis</i>   | 0,00% | 0,01% | 0,00% | 0,01% | 0,00% | 0,01% |
| <i>Erysipelotrichaceae</i>    | 0,01% | 0,02% | 0,00% | 0,01% | 0,00% | 0,00% |
| <i>Coprobacillus</i>          | 0,00% | 0,01% | 0,00% | 0,01% | 0,00% | 0,03% |
| <i>Anaerofilum</i>            | 0,00% | 0,01% | 0,00% | 0,01% | 0,00% | 0,02% |
| <i>Dorea.longicatena</i>      | 0,00% | 0,01% | 0,00% | 0,01% | 0,00% | 0,00% |
| <i>Anaerofustis</i>           | 0,00% | 0,01% | 0,00% | 0,00% | 0,00% | 0,03% |

**Table 2b Supplement**

| <i>Species</i>                      | HC<br>(mean) | HC (se) | NAFL<br>(mean) | NAFL (se) | NASH<br>(mean) | NASH<br>(se) |
|-------------------------------------|--------------|---------|----------------|-----------|----------------|--------------|
| <i>Bacteroides</i>                  | 11,43        | 0,27    | 11,92          | 0,47      | 10,15          | 0,82         |
| <i>Escherichia.coli</i>             | 5,31         | 0,80    | 5,83           | 0,93      | 8,67           | 0,69         |
| <i>Faecalibacterium.prausnitzii</i> | 11,05        | 0,15    | 10,68          | 0,64      | 9,41           | 0,89         |
| <i>Prevotella.copri</i>             | 3,74         | 0,78    | 6,14           | 1,75      | 5,69           | 1,40         |
| <i>Bacteroides.uniformis</i>        | 9,93         | 0,59    | 9,55           | 0,56      | 7,91           | 0,96         |
| <i>Lachnospiraceae</i>              | 10,53        | 0,15    | 10,78          | 0,30      | 10,29          | 0,22         |
| <i>Blautia</i>                      | 10,11        | 0,18    | 10,52          | 0,41      | 9,73           | 0,24         |
| <i>Oscillospira</i>                 | 10,59        | 0,18    | 8,71           | 0,41      | 8,67           | 0,68         |
| <i>Coprococcus</i>                  | 10,23        | 0,16    | 10,15          | 0,42      | 9,37           | 0,27         |
| <i>Ruminococcus</i>                 | 9,64         | 0,38    | 8,40           | 0,81      | 7,35           | 0,91         |
| <i>Dialister</i>                    | 6,19         | 0,86    | 8,10           | 1,37      | 5,81           | 1,08         |
| <i>Ruminococcaceae</i>              | 9,52         | 0,44    | 7,95           | 0,31      | 8,29           | 0,35         |
| <i>Akkermansia.muciniphila</i>      | 5,31         | 0,92    | 2,97           | 0,95      | 2,99           | 0,96         |
| <i>Phascolarctobacterium</i>        | 6,36         | 0,90    | 4,20           | 1,25      | 6,33           | 1,25         |
| <i>Streptococcus</i>                | 6,62         | 0,29    | 6,58           | 0,81      | 6,42           | 0,76         |
| <i>Sutterella</i>                   | 8,59         | 0,35    | 9,60           | 0,40      | 7,02           | 0,76         |
| <i>Megasphaera</i>                  | 1,29         | 0,52    | 4,16           | 1,30      | 3,79           | 1,22         |
| <i>Parabacteroides</i>              | 6,53         | 0,76    | 6,24           | 1,07      | 3,40           | 0,84         |
| <i>Acidaminococcus</i>              | 0,31         | 0,17    | 5,02           | 1,44      | 3,59           | 1,17         |
| <i>Bifidobacterium.adolescentis</i> | 5,81         | 0,65    | 5,79           | 1,48      | 4,75           | 1,07         |
| <i>Clostridiaceae</i>               | 7,66         | 0,39    | 8,05           | 0,49      | 6,30           | 0,68         |
| <i>Collinsella.aerofaciens</i>      | 7,23         | 0,57    | 9,05           | 0,71      | 6,93           | 0,65         |
| <i>Ruminococcus.bromii</i>          | 6,32         | 0,75    | 4,20           | 1,39      | 4,61           | 1,07         |
| <i>Clostridium.clostridioforme</i>  | 7,89         | 0,49    | 8,40           | 0,35      | 7,15           | 0,66         |
| <i>Parabacteroides.distasonis</i>   | 7,20         | 0,59    | 6,91           | 1,02      | 6,54           | 0,81         |
| <i>Roseburia.inulinivorans</i>      | 6,31         | 0,66    | 7,27           | 0,78      | 6,02           | 1,00         |

|                                   |               |                |               |                  |               |             |
|-----------------------------------|---------------|----------------|---------------|------------------|---------------|-------------|
| <i>Bacteroidales</i>              | 6,36          | 0,77           | 4,50          | 0,92             | 5,40          | 0,63        |
| <i>Gemmiger.formicilis</i>        | 7,74          | 0,43           | 6,63          | 0,79             | 6,61          | 0,68        |
| <i>Roseburia.faecis</i>           | 6,72          | 0,66           | 7,75          | 0,77             | 5,48          | 0,89        |
| <i>Clostridiales</i>              | 7,83          | 0,41           | 4,08          | 0,75             | 4,82          | 0,84        |
| <i>Lachnospira</i>                | 8,59          | 0,43           | 5,59          | 0,99             | 4,97          | 0,79        |
| <i>Bacteroides.fragilis</i>       | 4,87          | 0,67           | 2,63          | 0,98             | 3,99          | 1,01        |
| <i>Rikenellaceae</i>              | 7,92          | 0,53           | 5,28          | 0,96             | 6,18          | 0,40        |
| <i>Firmicutes</i>                 | 7,22          | 0,68           | 1,62          | 0,62             | 3,42          | 0,91        |
| <i>Alistipes.underdonkii</i>      | 5,50          | 0,71           | 3,28          | 0,96             | 3,68          | 0,84        |
| <i>Barnesiellaceae</i>            | 7,44          | 0,58           | 5,26          | 1,25             | 4,96          | 0,86        |
| <i>Bacteroides.eggerthii</i>      | 1,87          | 0,59           | 1,78          | 1,03             | 2,12          | 0,84        |
| <i>Veillonella.dispar</i>         | 2,91          | 0,61           | 3,45          | 0,68             | 3,70          | 0,85        |
| <i>Bacteroides.caccae</i>         | 4,18          | 0,68           | 5,04          | 1,07             | 3,91          | 0,91        |
| <i>Enterobacteriaceae</i>         | 2,71          | 0,50           | 0,81          | 0,45             | 4,48          | 0,97        |
| <i>Prevotella</i>                 | 2,19          | 0,70           | 1,70          | 0,70             | 3,19          | 0,99        |
| <i>Christensenellaceae</i>        | 7,05          | 0,51           | 3,38          | 0,97             | 3,92          | 0,82        |
| <b>Species</b>                    | <b>HC</b>     | <b>HC (se)</b> | <b>NAFL</b>   | <b>NAFL (se)</b> | <b>NASH</b>   | <b>NASH</b> |
|                                   | <b>(mean)</b> |                | <b>(mean)</b> |                  | <b>(mean)</b> | <b>(se)</b> |
| <i>Bifidobacterium.longum</i>     | 7,20          | 0,51           | 5,42          | 0,95             | 4,54          | 0,91        |
| <i>Dorea</i>                      | 6,76          | 0,20           | 7,63          | 0,49             | 6,80          | 0,57        |
| <i>Succinivibrio</i>              | 1,30          | 0,53           | 0,26          | 0,26             | 2,24          | 0,96        |
| <i>Bacteroidetes</i>              | 1,96          | 0,50           | 1,10          | 0,48             | 1,47          | 0,59        |
| <i>Blautia.obeuum</i>             | 7,18          | 0,33           | 6,64          | 0,40             | 4,85          | 0,80        |
| <i>Paraprevotella</i>             | 2,40          | 0,70           | 3,49          | 1,35             | 1,20          | 0,67        |
| <i>Prevotella</i>                 | 1,69          | 0,63           | 0,34          | 0,34             | 1,96          | 0,76        |
| <i>Ruminococcus.torques</i>       | 3,99          | 0,53           | 5,63          | 1,00             | 5,80          | 0,85        |
| <i>Roseburia</i>                  | 6,25          | 0,52           | 6,79          | 0,66             | 3,85          | 0,79        |
| <i>Clostridiaceae</i>             | 6,42          | 0,41           | 5,75          | 0,65             | 6,16          | 0,61        |
| <i>Clostridium.citroniae</i>      | 2,08          | 0,40           | 3,65          | 0,78             | 2,99          | 0,71        |
| <i>Bifidobacterium</i>            | 3,85          | 0,76           | 3,74          | 1,01             | 3,13          | 0,79        |
| <i>Odoribacter</i>                | 7,01          | 0,36           | 4,48          | 0,77             | 3,96          | 0,67        |
| <i>Bilophila</i>                  | 5,46          | 0,64           | 3,88          | 1,08             | 4,61          | 0,86        |
| <i>Fusobacterium</i>              | 0,74          | 0,30           | 0,46          | 0,32             | 1,63          | 0,89        |
| <i>Clostridium.celatum</i>        | 3,38          | 0,65           | 3,13          | 0,77             | 3,85          | 0,83        |
| <i>Prevotella.stercorea</i>       | 0,87          | 0,41           | 1,36          | 0,95             | 1,32          | 0,75        |
| <i>Desulfovibrio</i>              | 2,86          | 0,69           | 1,92          | 0,90             | 2,26          | 0,81        |
| <i>Alistipes.finegoldii</i>       | 4,78          | 0,57           | 2,93          | 0,86             | 1,61          | 0,53        |
| <i>Bacteroides.plebeius</i>       | 1,64          | 0,68           | 0,78          | 0,78             | 1,84          | 0,93        |
| <i>Erysipelotrichaceae</i>        | 6,62          | 0,32           | 4,50          | 0,81             | 2,60          | 0,70        |
| <i>Butyricoccus.pullicaecorum</i> | 5,42          | 0,21           | 6,28          | 0,65             | 5,30          | 0,61        |
| <i>Coriobacteriaceae</i>          | 5,78          | 0,32           | 5,19          | 0,60             | 3,58          | 0,77        |
| <i>Mogibacteriaceae</i>           | 6,05          | 0,18           | 4,63          | 0,65             | 4,87          | 0,61        |
| <i>Haemophilus.parainfluenzae</i> | 3,95          | 0,57           | 1,82          | 0,83             | 2,84          | 0,71        |
| <i>Blautia.producta</i>           | 4,70          | 0,58           | 1,37          | 0,74             | 2,09          | 0,67        |
| <i>Coprococcus.eutactus</i>       | 3,75          | 0,74           | 1,24          | 0,85             | 1,55          | 0,65        |
| RF32                              | 4,47          | 0,74           | 0,92          | 0,65             | 0,93          | 0,44        |

|                                     |               |                |               |                  |               |             |
|-------------------------------------|---------------|----------------|---------------|------------------|---------------|-------------|
| <i>Eubacterium.biforme</i>          | 0,70          | 0,43           | 0,90          | 0,61             | 4,34          | 0,97        |
| <i>Dorea.formicigenerans</i>        | 5,49          | 0,35           | 5,05          | 0,69             | 4,04          | 0,66        |
| <i>Lachnobacterium</i>              | 2,12          | 0,60           | 2,36          | 0,80             | 2,26          | 0,71        |
| <i>Bacteria</i>                     | 5,88          | 0,48           | 2,26          | 0,66             | 2,08          | 0,56        |
| YS2                                 | 4,67          | 0,71           | 1,07          | 0,61             | 1,09          | 0,55        |
| <i>Bacteroidales</i>                | 2,24          | 0,55           | 1,72          | 0,57             | 2,15          | 0,69        |
| <i>Anaerostipes</i>                 | 5,23          | 0,18           | 4,21          | 0,83             | 2,66          | 0,70        |
| <i>Ruminococcus.callidus</i>        | 2,48          | 0,62           | 1,88          | 0,73             | 1,15          | 0,55        |
| <i>Streptococcus.infantis</i>       | 1,13          | 0,37           | 1,42          | 0,64             | 1,47          | 0,49        |
| <i>Veillonella.parvula</i>          | 1,93          | 0,45           | 1,78          | 0,60             | 2,59          | 0,71        |
| <i>Butyricimonas</i>                | 3,61          | 0,49           | 2,63          | 0,78             | 2,13          | 0,61        |
| <i>Bifidobacterium.bifidum</i>      | 2,11          | 0,56           | 3,28          | 1,20             | 1,62          | 0,70        |
| <i>Coprococcus.catus</i>            | 4,16          | 0,53           | 2,95          | 0,81             | 3,12          | 0,67        |
| <i>Lactobacillus</i>                | 5,07          | 0,32           | 3,55          | 0,80             | 4,46          | 0,56        |
| RF39                                | 2,94          | 0,64           | 0,43          | 0,30             | 0,86          | 0,47        |
| <i>Lachnospiraceae</i>              | 3,72          | 0,49           | 2,73          | 0,81             | 3,23          | 0,60        |
| <b>Species</b>                      | <b>HC</b>     | <b>HC (se)</b> | <b>NAFL</b>   | <b>NAFL (se)</b> | <b>NASH</b>   | <b>NASH</b> |
|                                     | <b>(mean)</b> |                | <b>(mean)</b> |                  | <b>(mean)</b> | <b>(se)</b> |
| <i>Turcibacter</i>                  | 3,44          | 0,50           | 2,33          | 0,90             | 2,11          | 0,69        |
| <i>Anaerotruncus</i>                | 4,16          | 0,40           | 1,97          | 0,58             | 2,59          | 0,63        |
| <i>Adlercreutzia</i>                | 3,90          | 0,36           | 3,19          | 0,74             | 2,45          | 0,63        |
| <i>Actinomyces</i>                  | 2,42          | 0,40           | 2,32          | 0,64             | 2,60          | 0,53        |
| <i>Lactobacillus.reuteri</i>        | 0,74          | 0,31           | 2,01          | 0,83             | 1,76          | 0,71        |
| <i>Ruminococcus.gnavus</i>          | 2,84          | 0,40           | 2,30          | 0,85             | 2,82          | 0,60        |
| <i>Enterococcus</i>                 | 0,59          | 0,25           | 1,16          | 0,65             | 1,35          | 0,62        |
| <i>Alistipes.massiliensis</i>       | 1,03          | 0,44           | 0,48          | 0,34             | 0,70          | 0,38        |
| <i>Halomonas</i>                    | 2,00          | 0,38           | 1,96          | 0,56             | 2,71          | 0,59        |
| <i>Slackia</i>                      | 0,87          | 0,40           | 2,06          | 0,76             | 2,06          | 0,58        |
| <i>Clostridium.ramosum</i>          | 0,24          | 0,24           | 2,02          | 0,75             | 1,17          | 0,57        |
| <i>Bacteroides.ovatus</i>           | 2,26          | 0,43           | 2,35          | 0,59             | 1,23          | 0,50        |
| <i>Alistipes.indistinctus</i>       | 2,61          | 0,48           | 0,50          | 0,36             | 1,64          | 0,42        |
| <i>Clostridium.symbiosum</i>        | 0,60          | 0,26           | 0,26          | 0,26             | 1,36          | 0,54        |
| <i>Defluviitalea.saccharophila</i>  | 2,97          | 0,50           | 1,48          | 0,60             | 1,02          | 0,45        |
| <i>Shewanella.algae</i>             | 1,01          | 0,31           | 0,63          | 0,43             | 1,98          | 0,56        |
| ML615J.28                           | 2,04          | 0,60           | 0,26          | 0,26             | 0,52          | 0,36        |
| <i>Lactobacillus.manihotivorans</i> | 0,39          | 0,23           | 0,52          | 0,35             | 0,74          | 0,29        |
| <i>Clostridium.hathewayi</i>        | 1,07          | 0,32           | 1,14          | 0,51             | 0,79          | 0,37        |
| <i>Eggerthella.lenta</i>            | 1,26          | 0,40           | 1,11          | 0,60             | 0,86          | 0,41        |
| <i>Clostridium.methylpentosum</i>   | 3,11          | 0,38           | 1,75          | 0,61             | 1,81          | 0,53        |
| <i>Eubacterium.dolichum</i>         | 0,99          | 0,31           | 1,40          | 0,63             | 0,88          | 0,42        |
| <i>Rothia.mucilaginoso</i>          | 0,78          | 0,30           | 1,19          | 0,52             | 1,21          | 0,49        |
| <i>Lactococcus</i>                  | 1,36          | 0,32           | 0,00          | 0,00             | 1,51          | 0,51        |
| <i>Oxalobacter.formigenes</i>       | 1,27          | 0,40           | 0,41          | 0,41             | 0,86          | 0,47        |
| <i>Olsenella</i>                    | 0,56          | 0,27           | 1,63          | 0,63             | 1,48          | 0,54        |
| <i>Holdemania</i>                   | 2,51          | 0,33           | 1,57          | 0,50             | 1,80          | 0,52        |

|                               |      |      |      |      |      |      |
|-------------------------------|------|------|------|------|------|------|
| <i>Clostridium.lavalense</i>  | 1,09 | 0,31 | 1,01 | 0,55 | 0,55 | 0,38 |
| <i>Ruminococcaceae</i>        | 2,30 | 0,45 | 0,47 | 0,32 | 0,00 | 0,00 |
| <i>Mogibacterium</i>          | 0,00 | 0,00 | 1,14 | 0,54 | 1,52 | 0,49 |
| <i>Clostridium.spiroforme</i> | 0,79 | 0,31 | 1,08 | 0,61 | 0,47 | 0,26 |
| <i>TM7.3</i>                  | 0,48 | 0,23 | 1,06 | 0,46 | 0,73 | 0,34 |
| <i>Dehalobacterium</i>        | 1,07 | 0,34 | 0,34 | 0,34 | 0,80 | 0,38 |
| <i>Clostridia</i>             | 1,43 | 0,39 | 0,00 | 0,00 | 0,36 | 0,25 |
| <i>Alistipes.putredinis</i>   | 0,74 | 0,28 | 0,68 | 0,37 | 0,37 | 0,27 |
| <i>Erysipelotrichaceae</i>    | 1,88 | 0,32 | 0,78 | 0,44 | 0,14 | 0,14 |
| <i>Coprobacillus</i>          | 0,67 | 0,25 | 0,40 | 0,27 | 0,38 | 0,27 |
| <i>Anaerofilum</i>            | 1,01 | 0,26 | 0,95 | 0,42 | 0,82 | 0,38 |
| <i>Dorea.longicatena</i>      | 0,74 | 0,25 | 0,57 | 0,39 | 0,24 | 0,17 |
| <i>Anaerofustis</i>           | 0,83 | 0,26 | 0,17 | 0,17 | 0,50 | 0,29 |

**Table 3 Supplement**

| Family                        | normalized count mean | SE   | logFC | p <sup>uncorr</sup> | p <sup>corr</sup> |       |
|-------------------------------|-----------------------|------|-------|---------------------|-------------------|-------|
| F0/F1 vs. ≥F2                 | F0/F1                 | ≥F2  |       |                     |                   |       |
| o__Clostridiales_unclassified | 161                   | 414  | 0,791 | 1,083               | 0,171             | 0,978 |
| Desulfovibrionaceae           | 549                   | 313  | 0,704 | -0,886              | 0,208             | 0,978 |
| Pasteurellaceae               | 12                    | 95   | 0,932 | 1,089               | 0,242             | 0,978 |
| Halomonadaceae                | 49                    | 28   | 0,872 | -0,857              | 0,326             | 0,978 |
| Shewanellaceae                | 22                    | 14   | 1,174 | -1,077              | 0,359             | 0,978 |
| Verrucomicrobiaceae           | 1425                  | 351  | 1,402 | -1,258              | 0,370             | 0,978 |
| Prevotellaceae                | 2243                  | 6934 | 1,225 | 1,036               | 0,398             | 0,978 |
| Turicibacteraceae             | 12                    | 107  | 1,089 | 0,911               | 0,403             | 0,978 |
| Succinivibrionaceae           | 679                   | 105  | 1,786 | -1,291              | 0,470             | 0,978 |
| p__Bacteroidetes_unclassified | 31                    | 19   | 1,306 | -0,910              | 0,486             | 0,978 |
| Bifidobacteriaceae            | 1379                  | 838  | 1,532 | -0,914              | 0,551             | 0,978 |
| Alcaligenaceae                | 347                   | 486  | 1,375 | -0,797              | 0,562             | 0,978 |
| Paraprevotellaceae            | 244                   | 215  | 1,333 | 0,733               | 0,582             | 0,978 |
| Coriobacteriaceae             | 561                   | 735  | 1,188 | 0,561               | 0,637             | 0,978 |
| Clostridiaceae                | 2160                  | 989  | 1,334 | -0,620              | 0,642             | 0,978 |
| Veillonellaceae               | 3582                  | 6862 | 1,141 | 0,518               | 0,650             | 0,978 |
| Porphyromonadaceae            | 444                   | 649  | 1,121 | -0,499              | 0,656             | 0,978 |
| Mogibacteriaceae              | 118                   | 162  | 1,169 | 0,502               | 0,668             | 0,978 |
| Rikenellaceae                 | 416                   | 328  | 1,277 | -0,542              | 0,672             | 0,978 |
| o__Bacteroidales_unclassified | 41                    | 57   | 1,227 | 0,371               | 0,762             | 0,978 |
| Lactobacillaceae              | 375                   | 87   | 1,335 | -0,403              | 0,763             | 0,978 |
| p__Firmicutes_unclassified    | 380                   | 392  | 1,274 | -0,374              | 0,769             | 0,978 |
| Streptococcaceae              | 594                   | 745  | 1,494 | -0,391              | 0,793             | 0,978 |

|                     |      |       |       |        |       |       |
|---------------------|------|-------|-------|--------|-------|-------|
| Odoribacteraceae    | 57   | 143   | 0,683 | 0,168  | 0,806 | 0,978 |
| Ruminococcaceae     | 8419 | 11224 | 1,194 | 0,259  | 0,828 | 0,978 |
| Christensenellaceae | 115  | 232   | 0,874 | 0,187  | 0,831 | 0,978 |
| Barnesiellaceae     | 140  | 263   | 0,869 | -0,146 | 0,866 | 0,978 |
| S24-7               | 71   | 274   | 1,311 | -0,216 | 0,869 | 0,978 |
| Enterobacteriaceae  | 1231 | 6598  | 1,951 | 0,182  | 0,926 | 0,978 |
| Actinomycetaceae    | 15   | 26    | 0,793 | 0,072  | 0,928 | 0,978 |
| Lachnospiraceae     | 6881 | 11675 | 1,043 | 0,082  | 0,937 | 0,978 |
| Erysipelotrichaceae | 918  | 573   | 1,418 | -0,080 | 0,955 | 0,978 |
| Bacteroidaceae      | 6501 | 7795  | 1,536 | -0,053 | 0,973 | 0,978 |
| Micrococcaceae      | 12   | 22    | 1,283 | 0,035  | 0,978 | 0,978 |

**Supplement Figure 1**

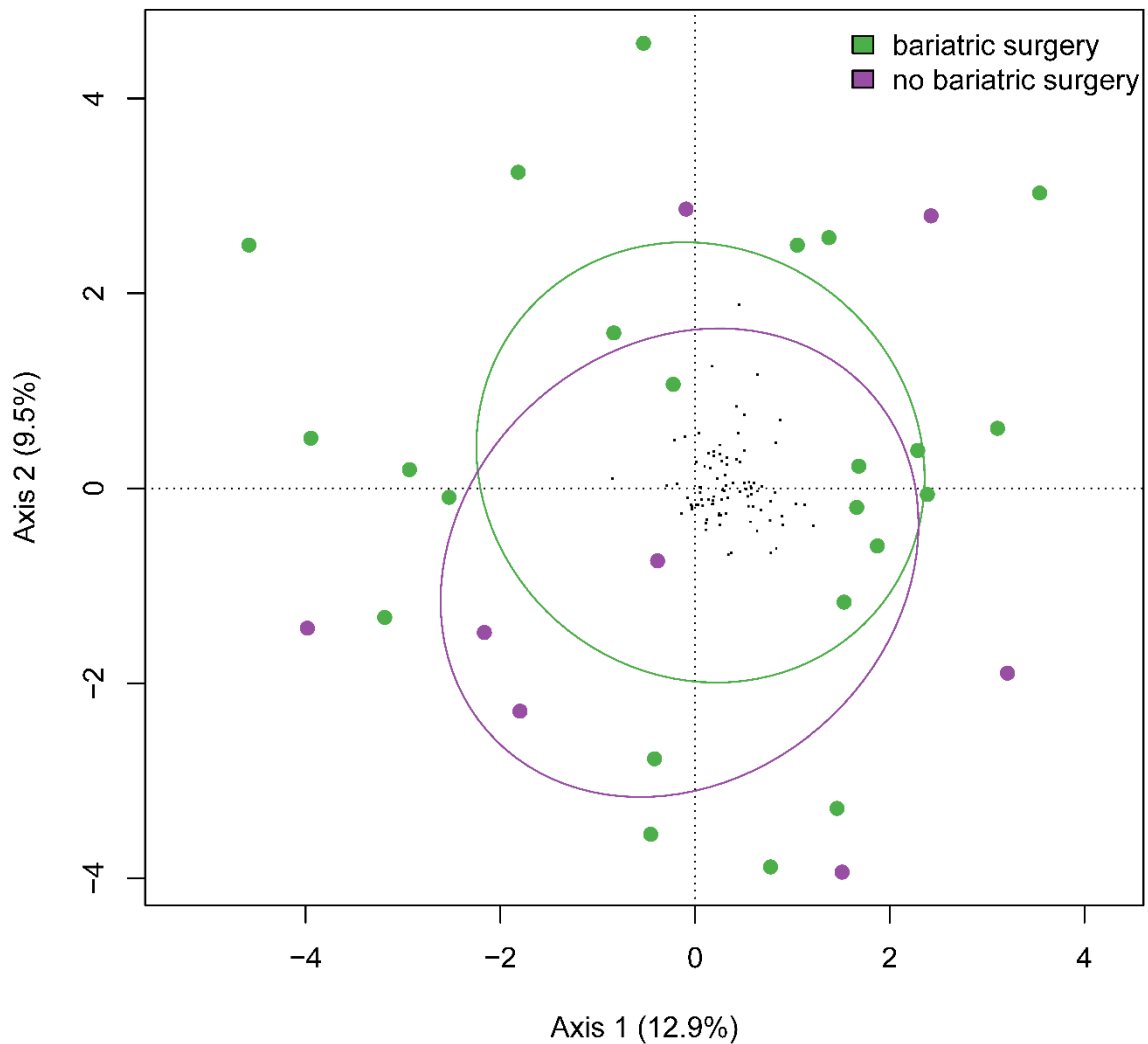

Supplement: 804444_Supplemental_material.pdf [file 804444_Supplemental_material.pdf]
